# Supplementary material for: Quantifying the effects of the microphysical properties of black carbon on the determination of brown carbon using measurements at multiple wavelengths
Source: Copernicus journal article supplement (doi:10.5194/acp-24-427-2024), 2024-01-11
Supplement: Supplementary file 1 [file acp-24-427-2024-supplement.pdf]

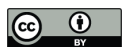

*Supplement of*

## **Quantifying the effects of the microphysical properties of black carbon on the determination of brown carbon using measurements at multiple wavelengths**

**Jie Luo et al.**

*Correspondence to:* Jibing Qiu ([qiujibing@ict.ac.cn](mailto:qiujibing@ict.ac.cn))

The copyright of individual parts of the supplement might differ from the article licence.

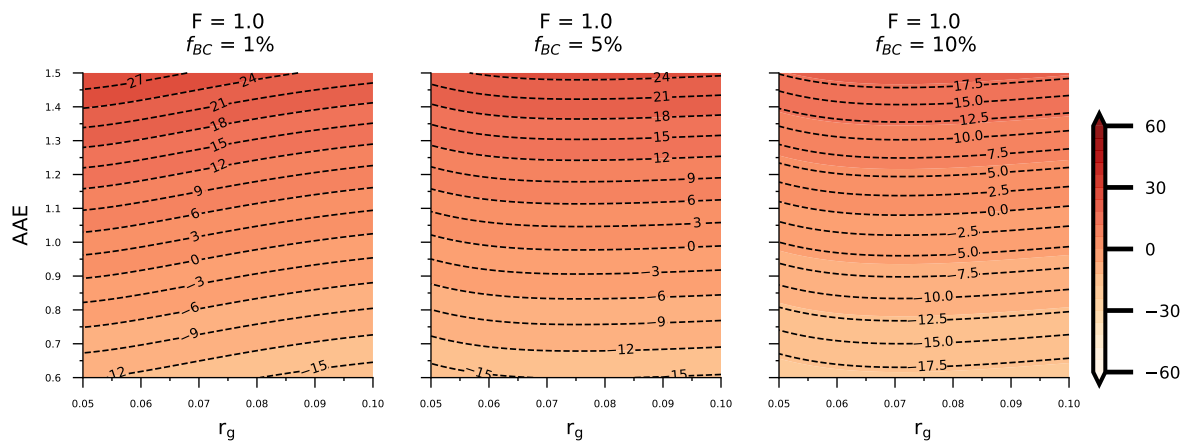

**Figure S1.** The variations of  $ABS_{BC}$  of fully coated BC ( $F = 1.0$ ) estimated based on the fixed AAE with the function of AAE and  $r_g$ , where the wavelength pair is 440 nm - 675 nm.

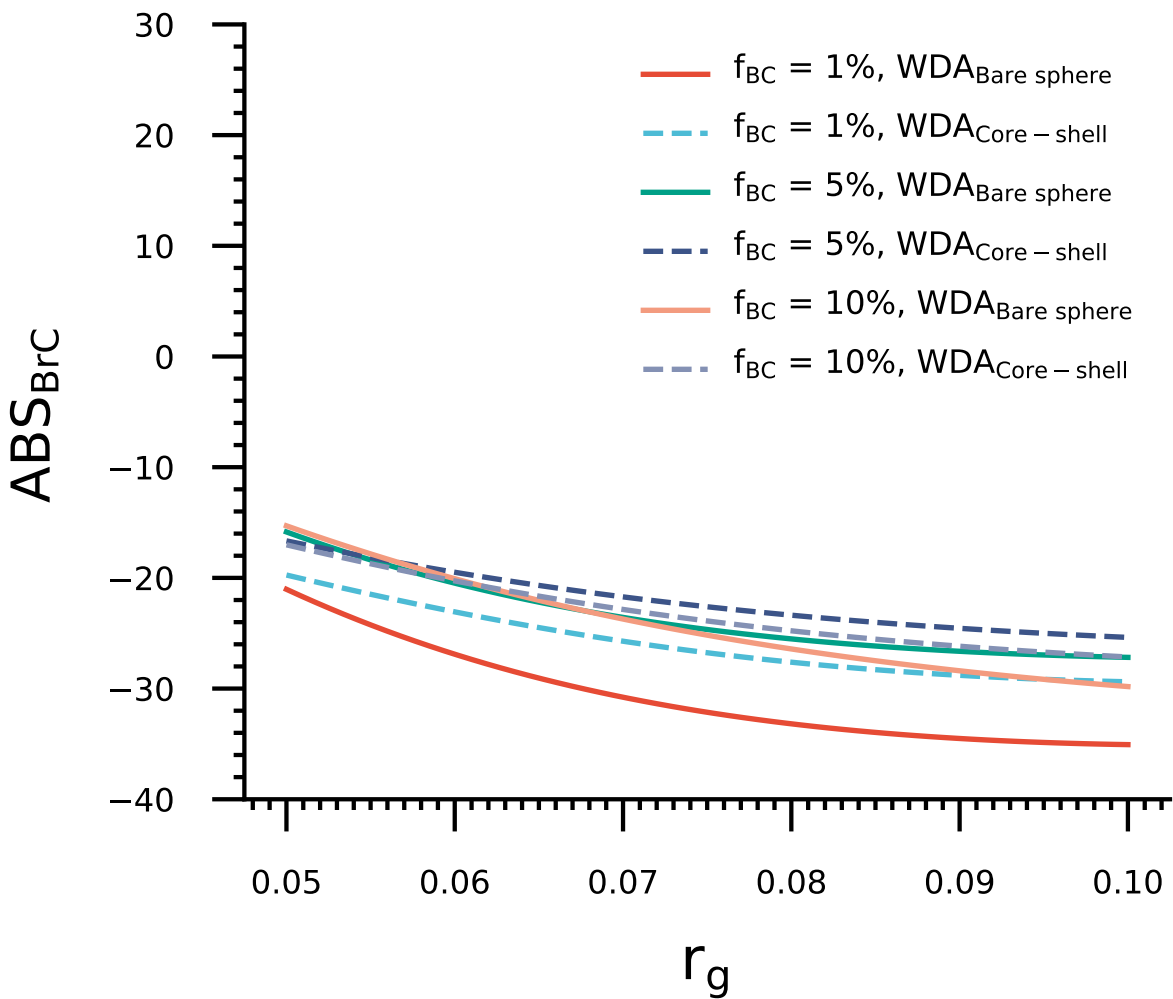

**Figure S2.** The variations of  $ABS_{BrC}$  estimated using the WDA method with  $r_g$  for fully coated BC ( $F = 1.0$ ).

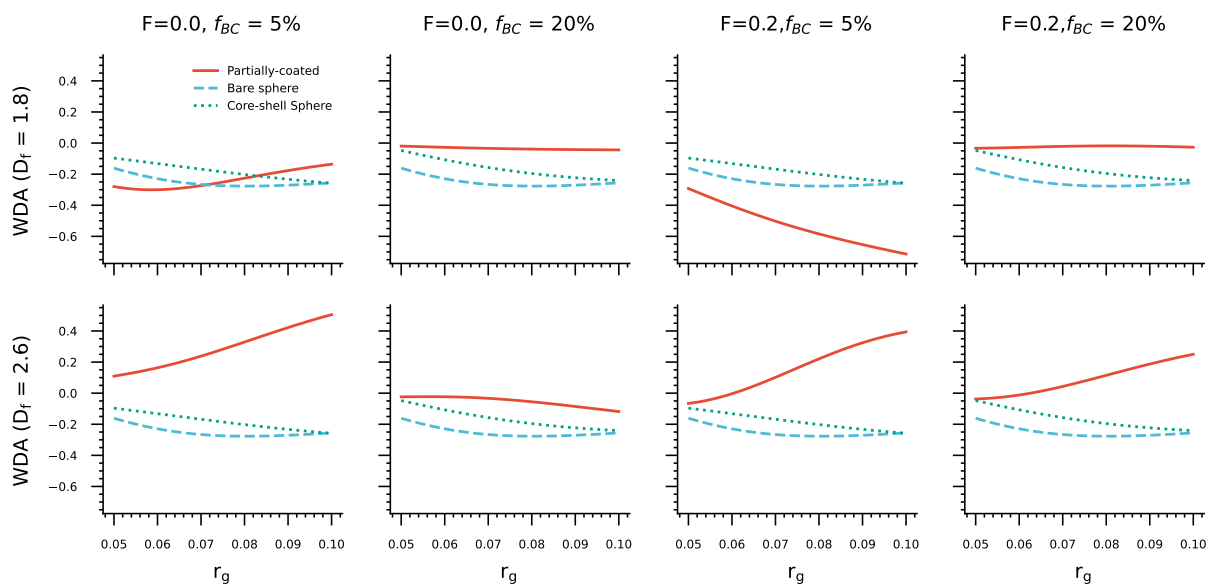

**Figure S3.** The variations WDA of BC with different morphologies with  $r_g$  at different mixing states, where  $\sigma_g = 1.4$ .

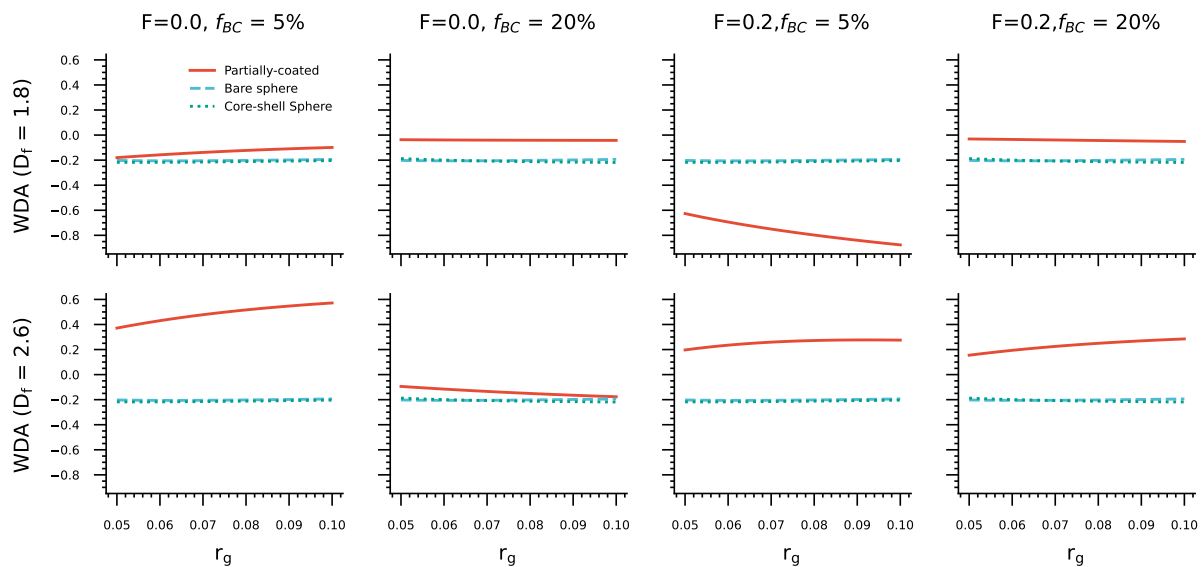

**Figure S4.** Similar to Figure S3, but for  $\sigma_g = 1.8$ .

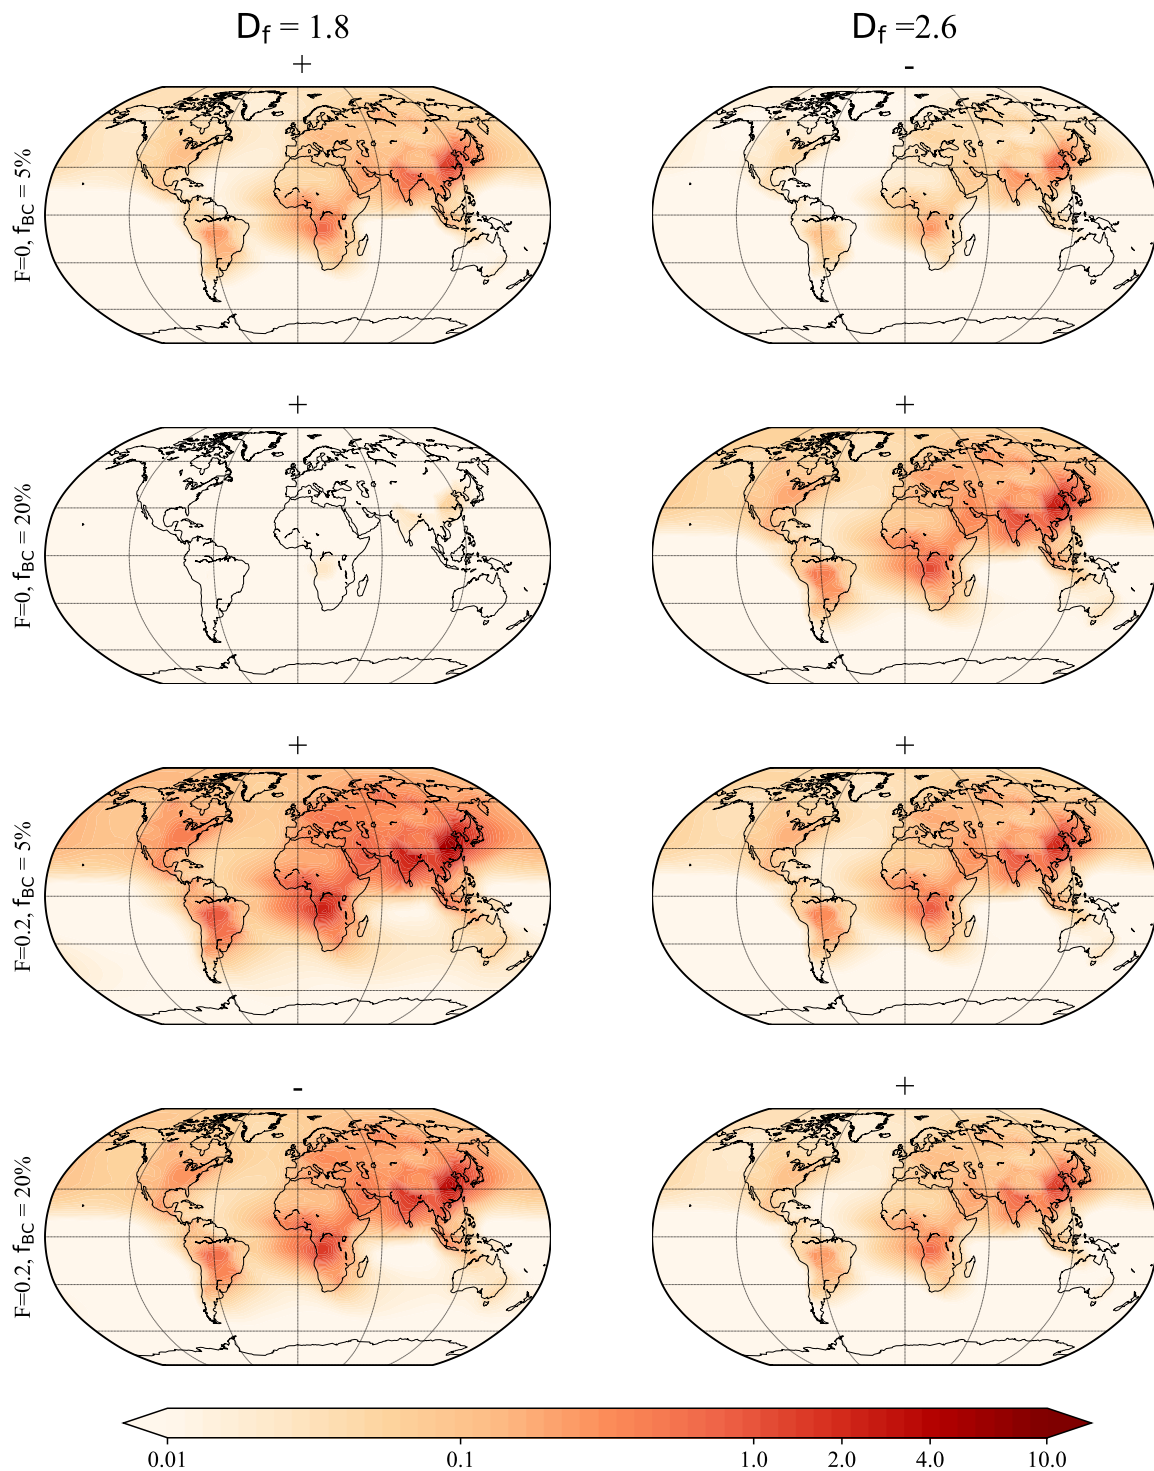

**Figure S5.** The global distributions of BC AAOD that is misattributed BrC based on the  $AAE_{440-675} = 1$  method, where negative sign means underestimation, and positive sign means overestimation.

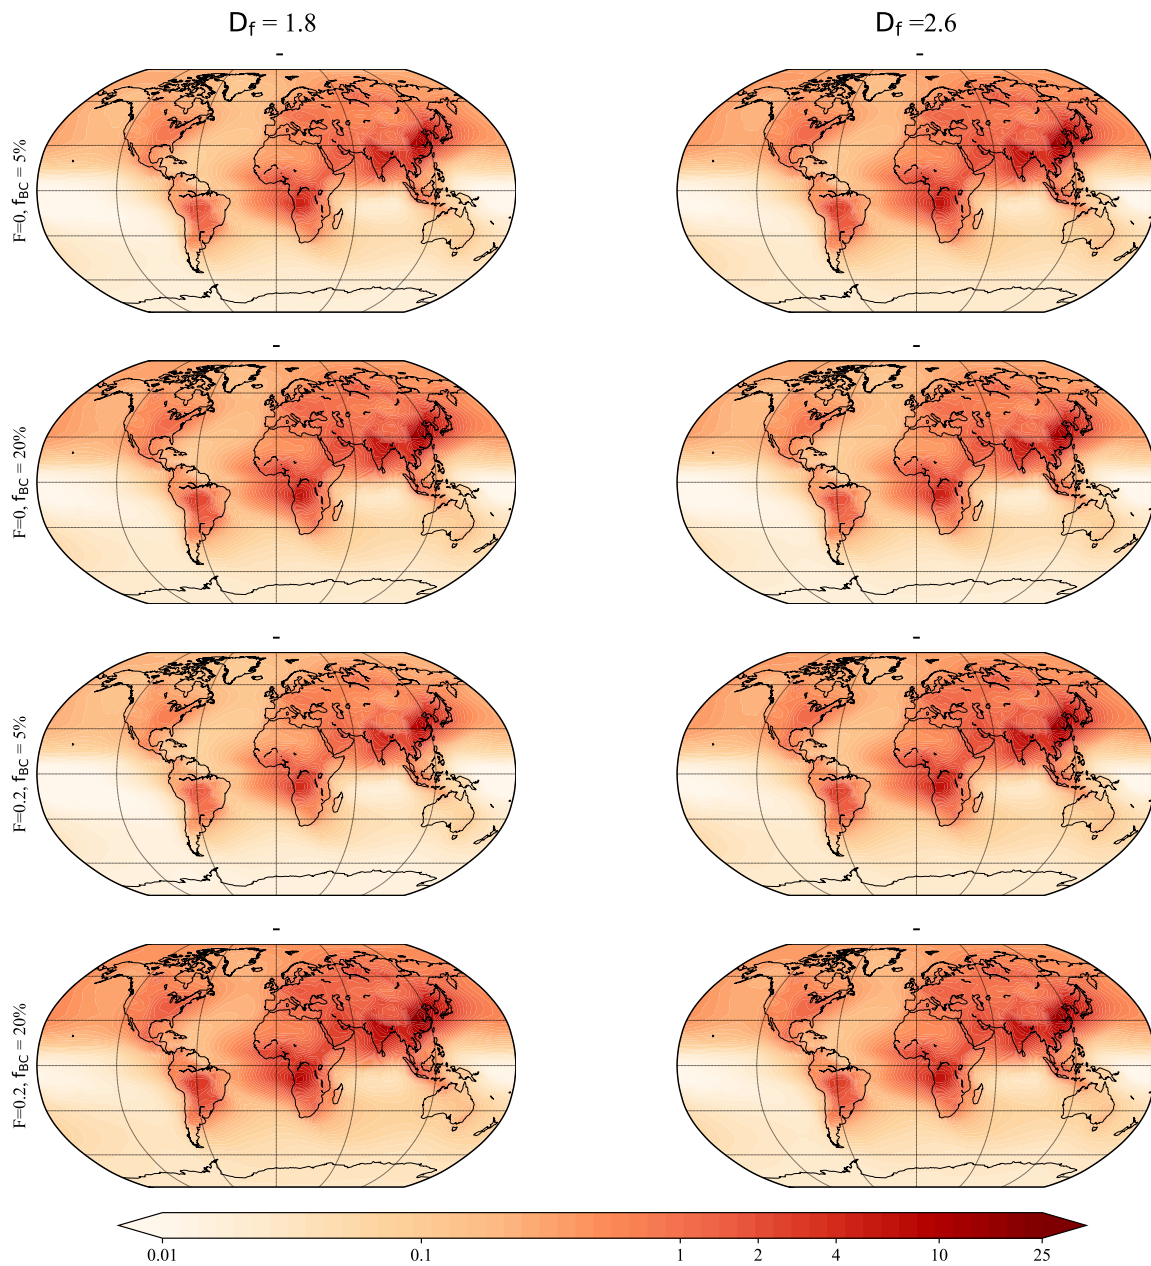

**Figure S6.** Similar to Figure S5, but for using the core-shell WDA method.
